# Supplementary material for: Photo-facilitated aggregation and correlated color temperature adjustment of single component organic solid state white-light emitting materials
Source: Royal Society of Chemistry journal article supplement (doi:10.1039/c4tc02771j), 2015-01-01
Supplement: c4tc02771j1.pdf [file c4tc02771j1.pdf]

## Supporting Information

### Photo-facilitated aggregation and correlated color temperature adjustment of single component organic solid state white-light emitting materials

Cheng Chen,<sup>a</sup> Xu-Hui Jin,<sup>a‡</sup> Xue-Jun Zhou,<sup>a</sup> Li-Xuan Cai,<sup>a</sup> Ya-Jun Zhang<sup>a</sup> and Jie Zhang\*<sup>a,b</sup>

<sup>a</sup> State Key Laboratory of Structural Chemistry, Fujian Institute of Research on the Structure of Matter, CAS, Fuzhou, Fujian 350002, P. R. China, E-mail: zhangjie@fjirsm.ac.cn

<sup>b</sup> School of Chemistry, Beijing Institute of Technology, Beijing, 100081, P. R. China

<sup>‡</sup> Current address: Department of Organic Chemistry, Weizmann Institute of Science, Rehovot 76100, Israel

\*\*\*\*\*

## Additional Figures and Table

**Fig. S1** The spectra data and the molecular structure of **PTP**.

**Fig. S2** UV-Vis and fluorescence spectra of **PTP** and **BPTP** measured in different solvents.

**Fig. S3** The electron spin resonance spectra of **BPTP** measured in solution.

**Fig. S4** UV-Vis absorption spectra and fluorescence spectra of **BPTP** at different concentrations.

**Fig. S5** UV-Vis spectra of **PTP** measured before and after UV light irradiation.

**Fig. S6** The fluorescence spectrum of **BPTP** in thin film state.

**Fig. S7** XRPD patterns of four crystalline materials.

**Fig. S8** The molecular packing arrangement in four crystalline materials.

**Fig. S9** Excitation spectra of four crystalline materials.

**Fig. S10** Fluorescence decay curves of freshly prepared **BPTP** solution in *n*-butanol and after UV irradiation .

**Fig. S11** Fluorescence decay curves of four crystalline materials.

**Fig. S12** The electron spin resonance spectra of four crystalline materials.

**Fig. S13** The <sup>1</sup>H NMR spectrum of **PTP**.

**Fig. S14** The <sup>1</sup>H NMR spectrum of **BPT**.

**Table S1.** The UV spectral data of **BPTP** measured in different solvents.

**Table S2.** The photophysical parameters of four crystalline materials.

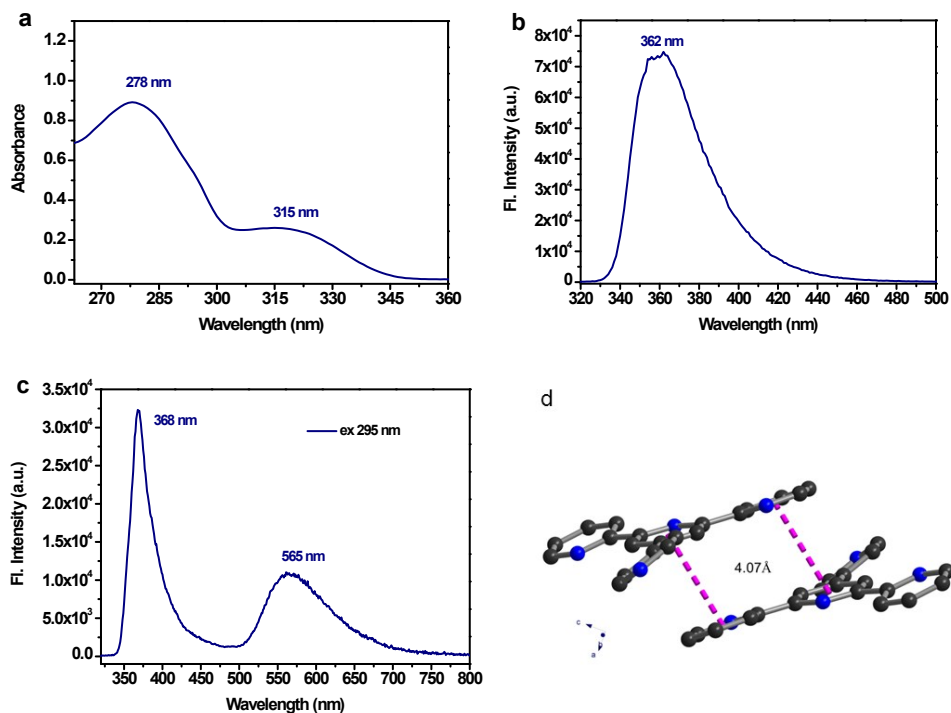

**Fig. S1** (a) The UV absorption spectrum of **PTP** ( $2.5 \times 10^{-5}$  mol/L) measured in *n*-butanol solution. (b) The fluorescence spectrum of **PTP** ( $2.5 \times 10^{-5}$  mol/L) measured in *n*-butanol solution. (c) The solid state fluorescence spectrum of **PTP**. (d) The non-planar propeller-like conformation and the stacking mode of **PTP** in crystalline state, the closest centroid distance is 4.07 Å.

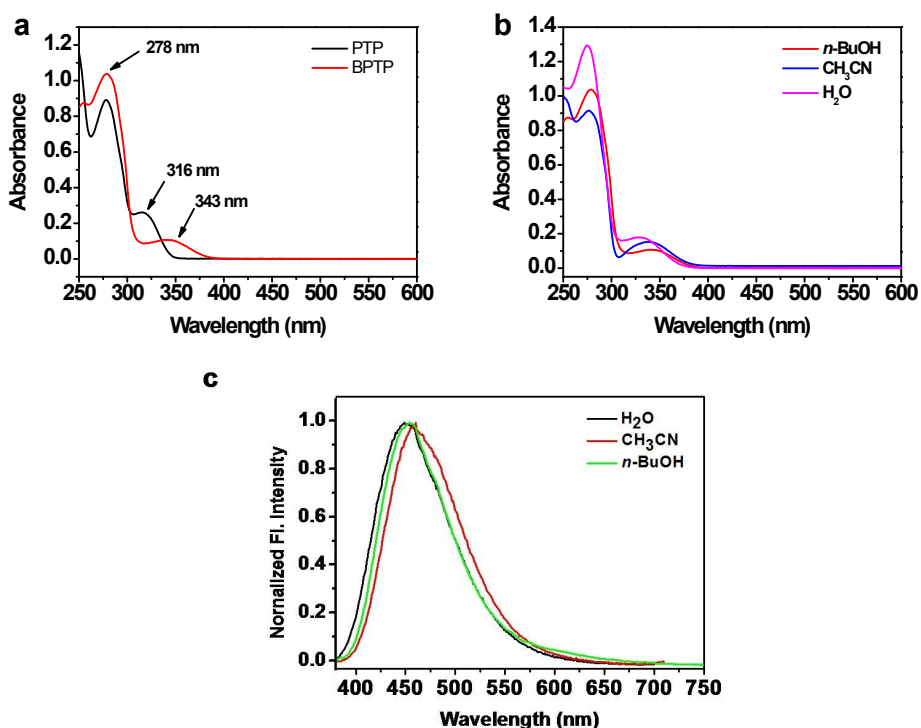

**Fig. S2** (a) The UV-Vis absorption spectra of **PTP** and **BPTP** ( $2.5 \times 10^{-5}$  mol/L) measured in *n*-butanol solution. (b) The UV-Vis absorption spectra of **BPTP** ( $2.5 \times 10^{-5}$  mol/L) measured in *n*-butanol, acetonitrile and aqueous solutions. (c) The fluorescence spectra of **BPTP** ( $2.5 \times 10^{-5}$  mol/L) measured in *n*-butanol, acetonitrile and aqueous solutions, and there fluorescence emission bands were at 455 nm, 460 nm and 449 nm, respectively.

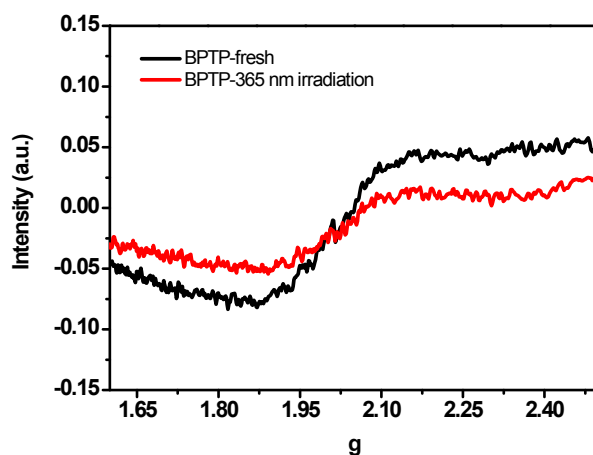

**Fig. S3** The electron spin resonance spectra of **BPTP** ( $2.5 \times 10^{-5}$  mol/L) measured in freshly prepared *n*-butanol solution (black) and after UV light (365 nm) irradiation for 100 minutes (red).

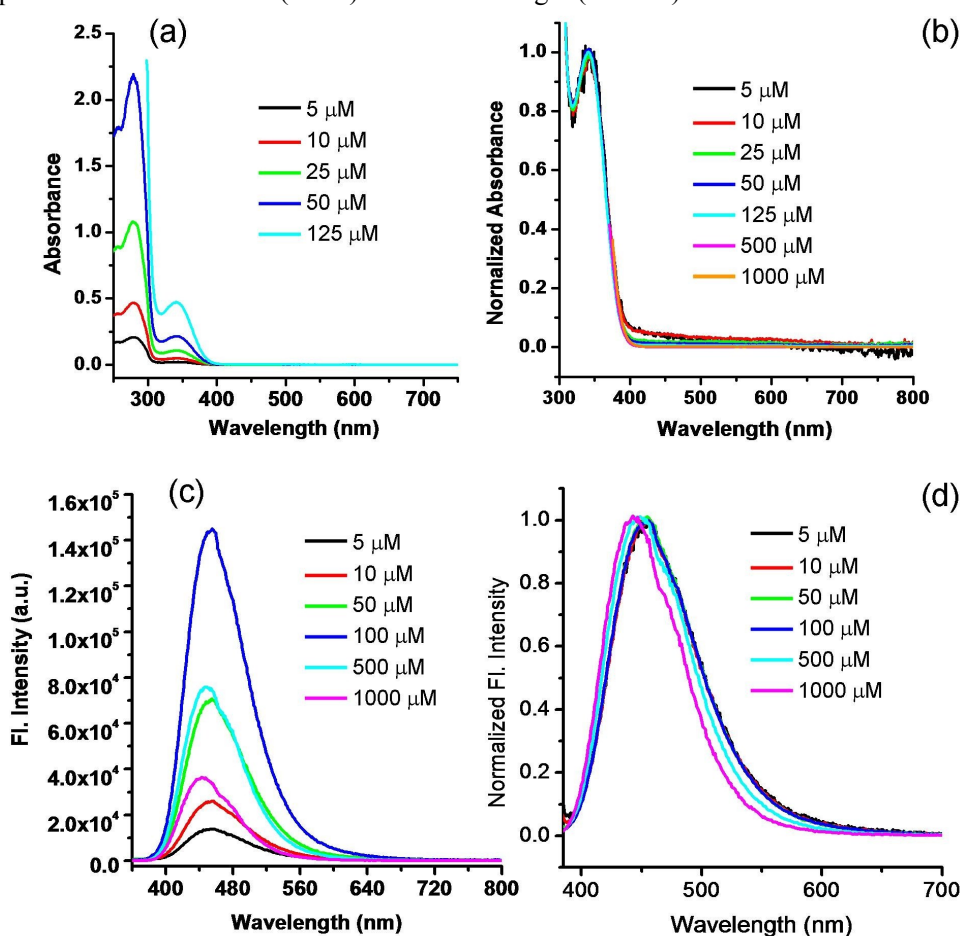

**Fig. S4** (a) Concentration dependence of UV-Vis absorption spectra for **BPTP** in *n*-butanol solution. (b) Normalized adsorption spectra in the wavelength region of 300-800 nm at different concentrations. The small difference in the wavelength above 400 nm should be due to the deviation of baseline of the spectra for the sample in low concentration. (c) Fluorescence emission spectra for **BPTP** in *n*-butanol solution at different concentrations with the excitation wavelength of 345 nm. (d) Normalized emission spectra for **BPTP** in *n*-butanol solution at different concentrations with the excitation wavelength of 345 nm. The absorption spectra have little change with increasing the concentration of the solution, indicating weak intermolecular charge transition in the ground state in the absence of light irradiation, which is consistent with the observation on the fluorescence emission spectra without the emergence of the long-wavelength emission band.

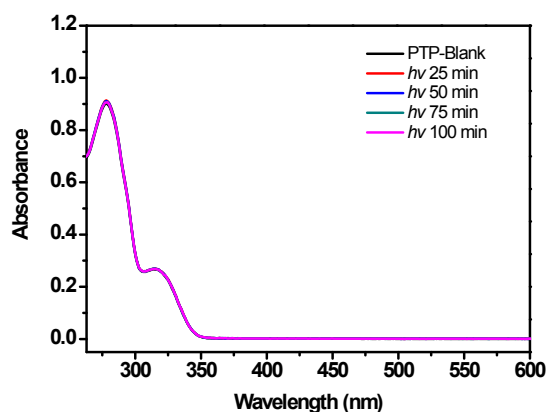

**Fig. S5** The UV-Vis absorption spectra of **PTP** measured in freshly prepared *n*-butanol solution and after UV light (365 nm) irradiation.

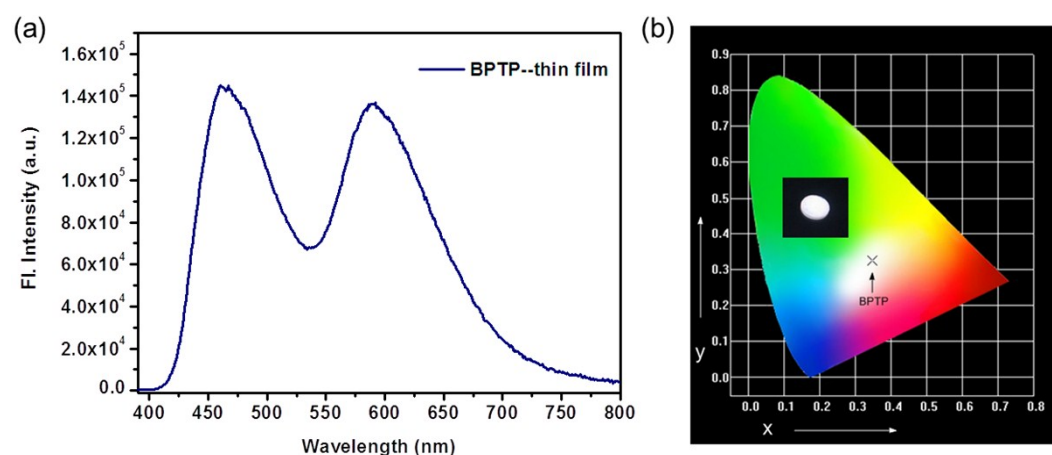

**Fig. S6** (a) The fluorescence spectrum of the **BTPP** in thin film state; (b) Emission colors in a CIE 1931 chromaticity diagram: **BTPP** (0.347, 0.325). The insert photograph were taken under UV light (365 nm hand-held UV lamp,  $1.2 \text{ mW}\cdot\text{cm}^{-2}$ ), showing the white-light emission of this material.

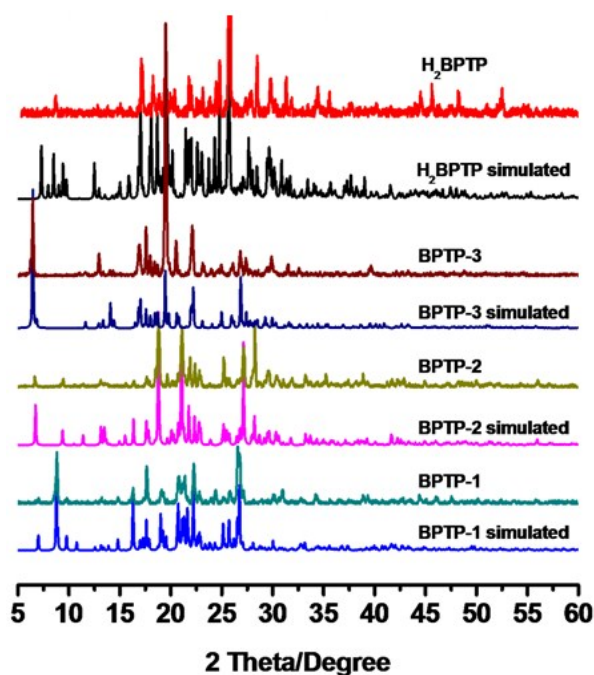

**Fig. S7** The calculated and experimental XRPD patterns of four crystalline materials.

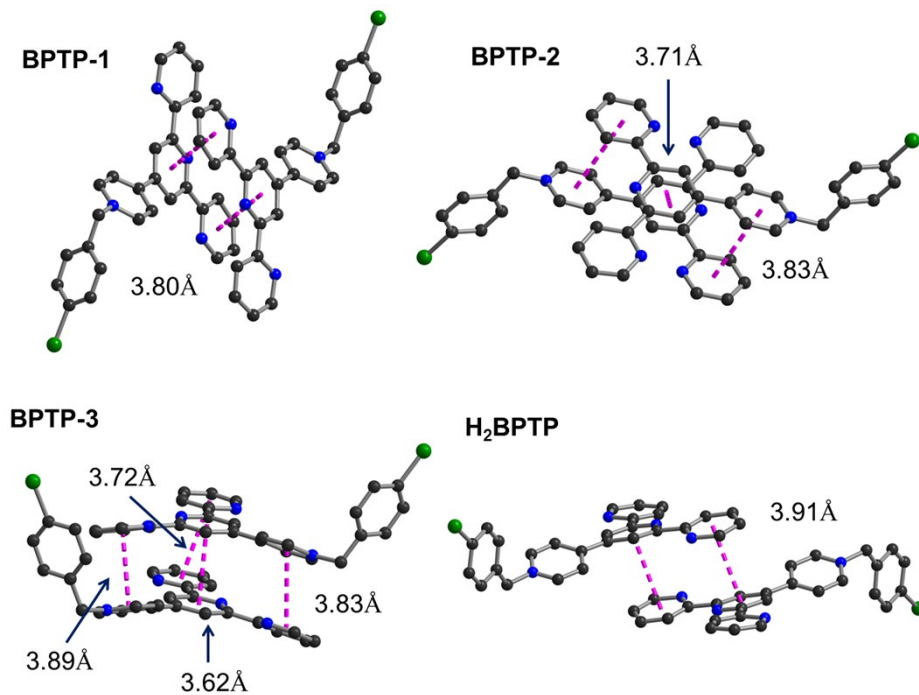

**Fig. S8** The  $\pi$ -stacking interactions in four crystalline materials.

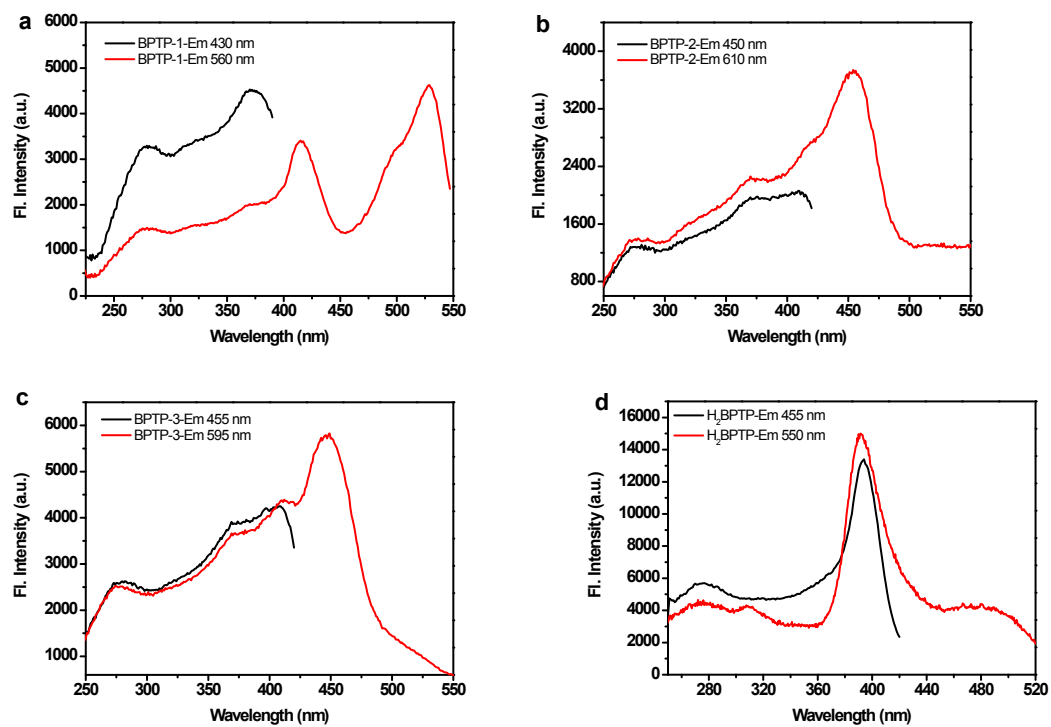

**Fig. S9** Excitation spectra of four materials monitored at corresponding wavelength in crystalline states. (a) **BPTP-1**; (b) **BPTP-2**; (c) **BPTP-3** and (d) **H<sub>2</sub>BPTP**.

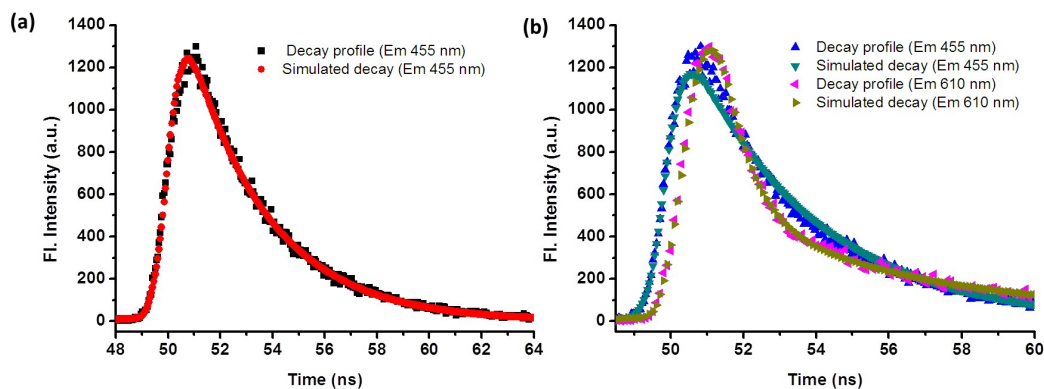

**Fig. S10** Fluorescence decay curves of freshly prepared **BPTP** solution in *n*-butanol (a) and after UV irradiation (b).

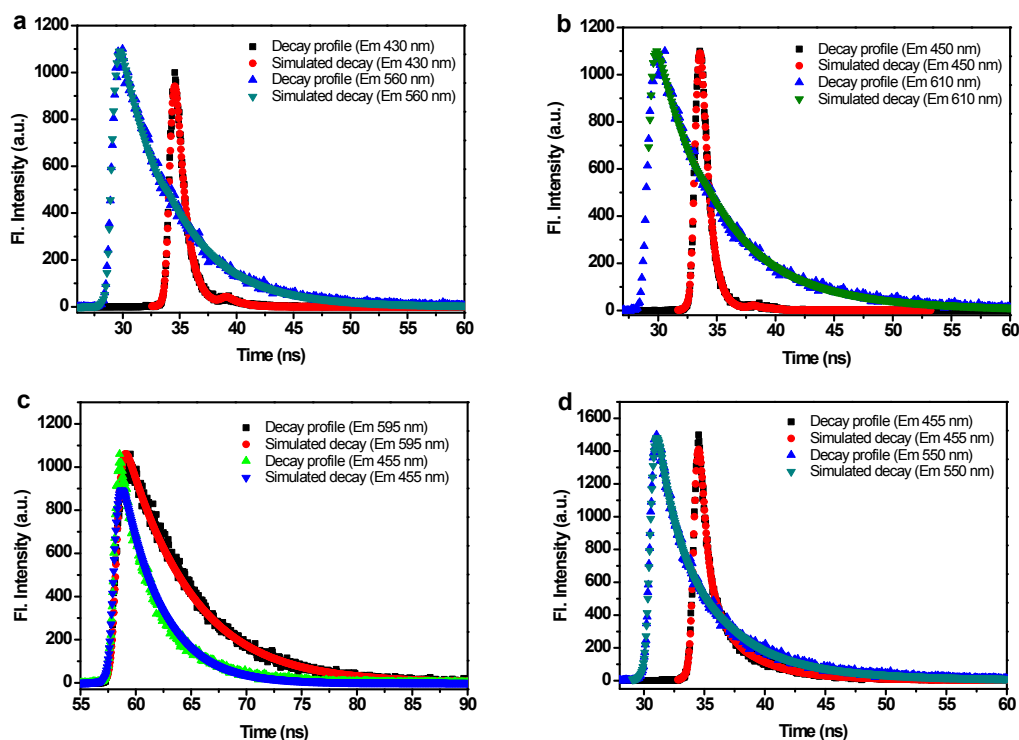

**Fig. S11** Fluorescence decay curves of four crystalline materials. (a) **BPTP-1**, (b) **BPTP-2**, (c) **BPTP-3** and (d) **H<sub>2</sub>BPTP**.  $\lambda_{\text{ex}} = 345$  nm, monitoring wavelengths are shown as inset.

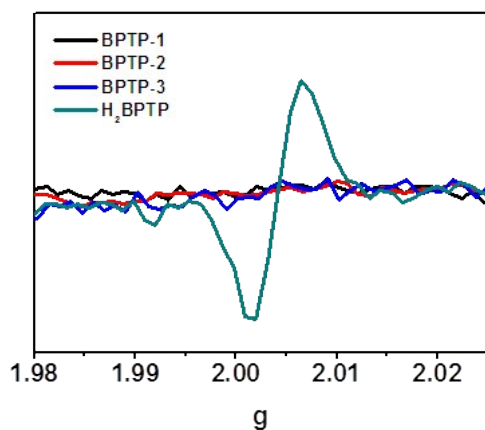

**Fig. S12** The electron spin resonance spectra of **BPTP-1**, **BPTP-2**, **BPTP-3** and **H<sub>2</sub>BPTP**.

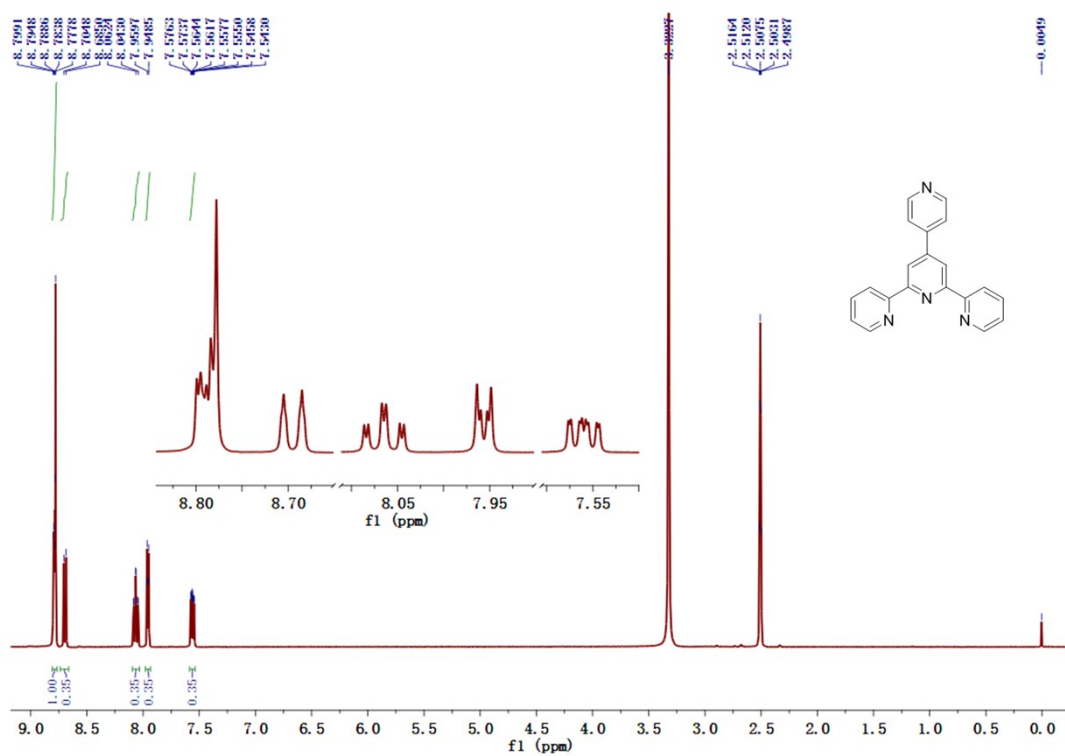

Fig. S13 The  $^1\text{H}$  NMR spectrum of **PTP** measured in DMSO-D6 (400 MHz).

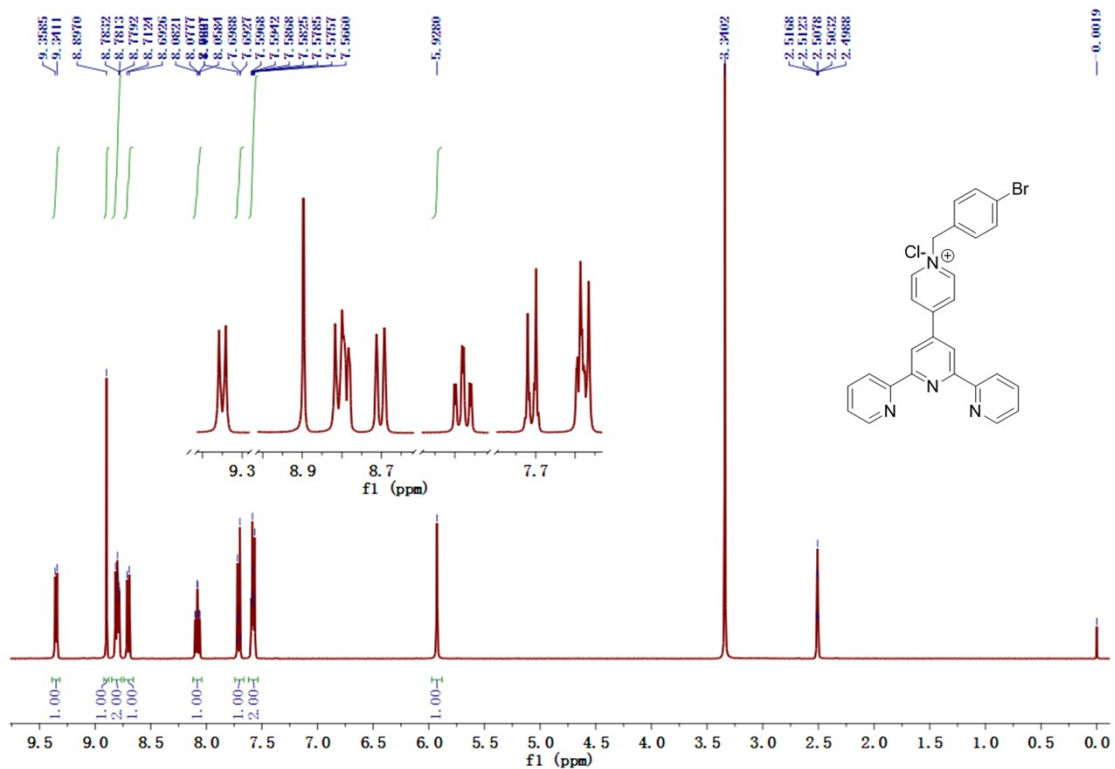

Fig. S14  $^1\text{H}$  NMR spectrum of **BPT** measured in DMSO-D6 (400 MHz).

**Table S1.** The UV-Vis absorption bands of **BPTP** ( $2.5 \times 10^{-5}$  mol/L) measured in different solutions.

| Solvent               | H <sub>2</sub> O | CH <sub>3</sub> CN | EtOH    | THF     | n-BuOH  | CHCl <sub>3</sub> |
|-----------------------|------------------|--------------------|---------|---------|---------|-------------------|
| Absorption bands (nm) | 274/327          | 277/337            | 278/339 | 277/342 | 278/343 | 278/351           |

**Table S2.** The photophysical parameters of the compounds: PL maxima ( $\lambda$ ), PL quantum yields and decay times ( $\Phi_{\text{PL}}$ ,  $\tau$ ).

| Compd                            | single crystal   |                  |                            |                            |                        |
|----------------------------------|------------------|------------------|----------------------------|----------------------------|------------------------|
|                                  | $\lambda_1$ (nm) | $\lambda_2$ (nm) | $\tau_1$ (ns) <sup>a</sup> | $\tau_2$ (ns) <sup>b</sup> | $\Phi_{\text{PL}}$ (%) |
| <b>BPTP</b> in <i>n</i> -butanol | 455 <sup>c</sup> |                  | 2.93(100%)                 |                            | /                      |
|                                  | 455 <sup>d</sup> | 610 <sup>d</sup> | 3.33(100%) <sup>d</sup>    | 0.67(28.33%) <sup>d</sup>  | /                      |
|                                  |                  |                  |                            | 4.55(41.33%) <sup>d</sup>  |                        |
|                                  |                  |                  | 23.03(30.35%) <sup>d</sup> |                            |                        |
| <b>BPTP-1</b>                    | 430              | 560              | 0.85(100%)                 | 4.28(87.08%)               | 5.54                   |
|                                  |                  |                  |                            | 9.86(12.92%)               |                        |
| <b>BPTP-2</b>                    | 450              | 610              | 0.67(100%)                 | 4.23(62.97%)               | 5.46                   |
|                                  |                  |                  |                            | 9.28(37.03%)               |                        |
| <b>BPTP-3</b>                    | 455              | 595              | 3.38(100%)                 | 5.75(100%)                 | 7.40                   |
| <b>H<sub>2</sub>BPTP</b>         | 455              | 550              | 0.38(29.16%)               | 1.02(11.43%)               | /                      |
|                                  |                  |                  | 1.90(42.26%)               | 3.68(60.39%)               |                        |
|                                  |                  |                  | 5.48(28.60%)               | 9.24(28.18%)               |                        |

<sup>a</sup> The fluorescence lifetime corresponding to the  $\lambda_1$ . <sup>b</sup> The fluorescence lifetime corresponding to the  $\lambda_2$ .

<sup>c</sup> Freshly prepared solution. <sup>d</sup> after light irradiation.
